# Supplementary material for: Xeno-Free Spheroids of Human Gingiva-Derived Progenitor Cells for Bone Tissue Engineering
Source: PubMed Central journal article supplement (PMC7466771; doi:10.3389/fbioe.2020.00968), 2020-08-19
Supplement: Data_Sheet_1.pdf [file Data_Sheet_1.pdf]

## Supplementary material

### 1. Supplementary methods

#### 1.1. Production of human platelet lysate (HPL)

The HPL herein (Bergenslys®, Bergen, Norway) was prepared from outdated pooled whole blood-derived platelet concentrates (PCs) at the Department of Immunology and Transfusion Medicine, Haukeland University Hospital, Bergen, Norway. Briefly, unused 7 d-old PCs were used for HPL production via multiple freezing (−80°C) and thawing cycles (+37°C). Pooled PCs were then centrifuged at 3000 x g (4°C, 15 min) to remove platelet fragments and aliquoted as the final HPL product. HPL aliquots were stored at −80°C and thawed overnight at 4°C for subsequent use in experiments. In HPL-supplemented media, 1 IU/mL of heparin was added to prevent gelation and the medium was sterile filtered (0.2 µm) before use.

### 2. Supplementary tables and figures

#### 2.1. Supplementary table 1: Real-time PCR assays

| Gene                        | TaqMan® Assay ID | Amplicon length |
|-----------------------------|------------------|-----------------|
| <b>Housekeeping gene</b>    |                  |                 |
| GAPDH                       | Hs 02758991_g1   | 93              |
| <b>Adipogenesis-related</b> |                  |                 |
| PPARG                       | Hs01115513_m1    | 90              |
| LPL                         | Hs00173425_m1    | 103             |
| <b>Osteogenesis-related</b> |                  |                 |
| RUNX2                       | Hs01047973_m1    | 86              |
| BMP2                        | Hs00154192_m1    | 60              |
| ALPL                        | Hs01029144_m1    | 79              |
| COL1A2                      | Hs00164099_m1    | 68              |
| OPN (SPP1)                  | Hs00959010_m1    | 84              |
| OCN (BGLAP)                 | Hs01587814_g1    | 138             |
| <b>Stemness-related</b>     |                  |                 |
| SOX2                        | Hs01053049_s1    | 91              |
| OCT4 (POU5F1)               | Hs00999632_g1    | 77              |
| NANOG                       | Hs02387400_g1    | 109             |

GAPDH glyceraldehyde 3-phosphate dehydrogenase, PPARG peroxisome proliferator activated receptor gamma, LPL lipoprotein lipase, RUNX2 runt-related transcription factor 2, BMP2 bone morphogenetic protein 2, ALPL alkaline phosphatase, COL1A2 Collagen type 1, OPN/SPP1 Osteopontin, OCN/BGLAP Osteocalcin, SOX2 sex determining region Y-box 2, OCT4/POU5F1 octamer-binding transcription factor 4, NANOG homeobox transcription factor nanog

## Supplementary material

### 2.2. Supplementary table 2: Multiplex human cytokine screening panel

| Abbreviation           | Cytokine                                                      |
|------------------------|---------------------------------------------------------------|
| b-FGF/FGF2             | Basic fibroblast growth factor                                |
| Eotaxin/CCL11          | C-C chemokine 11                                              |
| G-CSF                  | Granulocyte colony stimulating factor                         |
| GM-CSF                 | Granulocyte-macrophage colony-stimulating factor              |
| IFN- $\gamma$          | Interferon- $\gamma$                                          |
| IL-1 $\beta$           | Interleukin-1 $\beta$                                         |
| IL-1ra                 | Interleukin 1 receptor antagonist                             |
| IL-1 $\alpha$          | Interleukin-1 $\alpha$                                        |
| IL-2R $\alpha$         | Interleukin-2 receptor $\alpha$                               |
| IL-3                   | Interleukin-3                                                 |
| IL-12 (p40)            | Interleukin-12 subunit beta                                   |
| IL-16                  | Interleukin-16                                                |
| IL-2                   | Interleukin-2                                                 |
| IL-4                   | Interleukin-4                                                 |
| IL-5                   | Interleukin-5                                                 |
| IL-6                   | Interleukin-6                                                 |
| IL-7                   | Interleukin-7                                                 |
| IL-8                   | Interleukin-8                                                 |
| IL-9                   | Interleukin-9                                                 |
| GRO- $\alpha$ /CXCL1   | Growth-regulated alpha protein/CXC ligand 1                   |
| HGF                    | Hepatocyte growth factor                                      |
| IFN- $\alpha$ 2        | Interferon- $\alpha$ 2                                        |
| LIF                    | Leukemia inhibitory factor                                    |
| MCP-3/CCL7             | Monocyte chemotactic protein-3                                |
| IL-10                  | Interleukin-10                                                |
| IL-12 (p70)            | Interleukin-12                                                |
| IL-13                  | Interleukin-13                                                |
| IL-15                  | Interleukin-15                                                |
| IL-17A                 | Interleukin-17                                                |
| IL-18                  | Interleukin-18                                                |
| IP-10/CXCL10           | Interferon gamma-induced protein 10/CXC chemokine 10          |
| MCP-1/CCL2             | Monocyte Chemoattractant Protein-1                            |
| MIG/CXCL9              | Monokine induced by gamma interferon/CXC ligand 9             |
| $\beta$ -NGF           | Nerve growth factor                                           |
| SCF/KITLG              | Stem cell factor/KIT-ligand                                   |
| SCGF- $\beta$          | Stem cell growth factor                                       |
| SDF-1 $\alpha$ /CXCL12 | Stromal cell-derived factor 1                                 |
| MIP-1 $\alpha$ /CCL3   | Macrophage inflammatory protein                               |
| MIP-1 $\beta$ /CCL4    | Macrophage inflammatory protein                               |
| PDGF-BB                | Platelet-derived growth factor-BB                             |
| RANTES/CCL5            | Regulated on activation, normal T cell expressed and secreted |
| Eotaxin/CCL11          | Eotaxin                                                       |
| TNF- $\alpha$          | Tumor necrosis factor- $\alpha$                               |
| TNF- $\beta$           | Tumor necrosis factor- $\beta$                                |
| VEGF                   | Vascular endothelial growth factor                            |
| CTACK/CCL27            | Cutaneous T-Cell Attracting Chemokine                         |
| MIF                    | Macrophage migration inhibitory factor                        |
| TRAIL                  | TNF-related apoptosis-inducing ligand                         |
| M-CSF                  | Macrophage colony-stimulating factor                          |

## Supplementary material

### 2.3. Supplementary figure 1: Osteogenic differentiation of monolayer GPCs and BMSCs on copolymer scaffolds

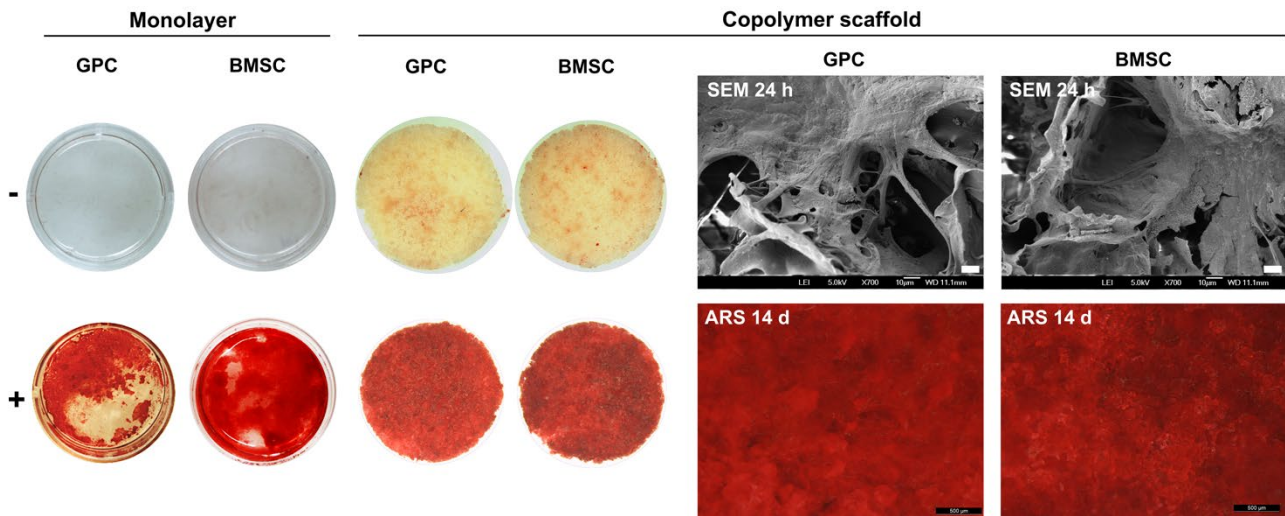

Alizarin red S staining (ARS) reveals osteogenic differentiation of GPCs and BMSCs in monolayer (21 d) and on poly(LLA-co-CL) scaffolds (14 d) under osteogenically induced (+) and non-induced (-) conditions; SEM reveals cell attachment and spreading on the scaffold surface after 24 h; scale bars 10  $\mu\text{m}$  (*top*); magnified view of Alizarin red-stained scaffolds (*bottom*, scale bars 500  $\mu\text{m}$ )

## Supplementary material

### 2.4. Supplementary figure 2: Gene expression in 3D spheroids of independent donors.

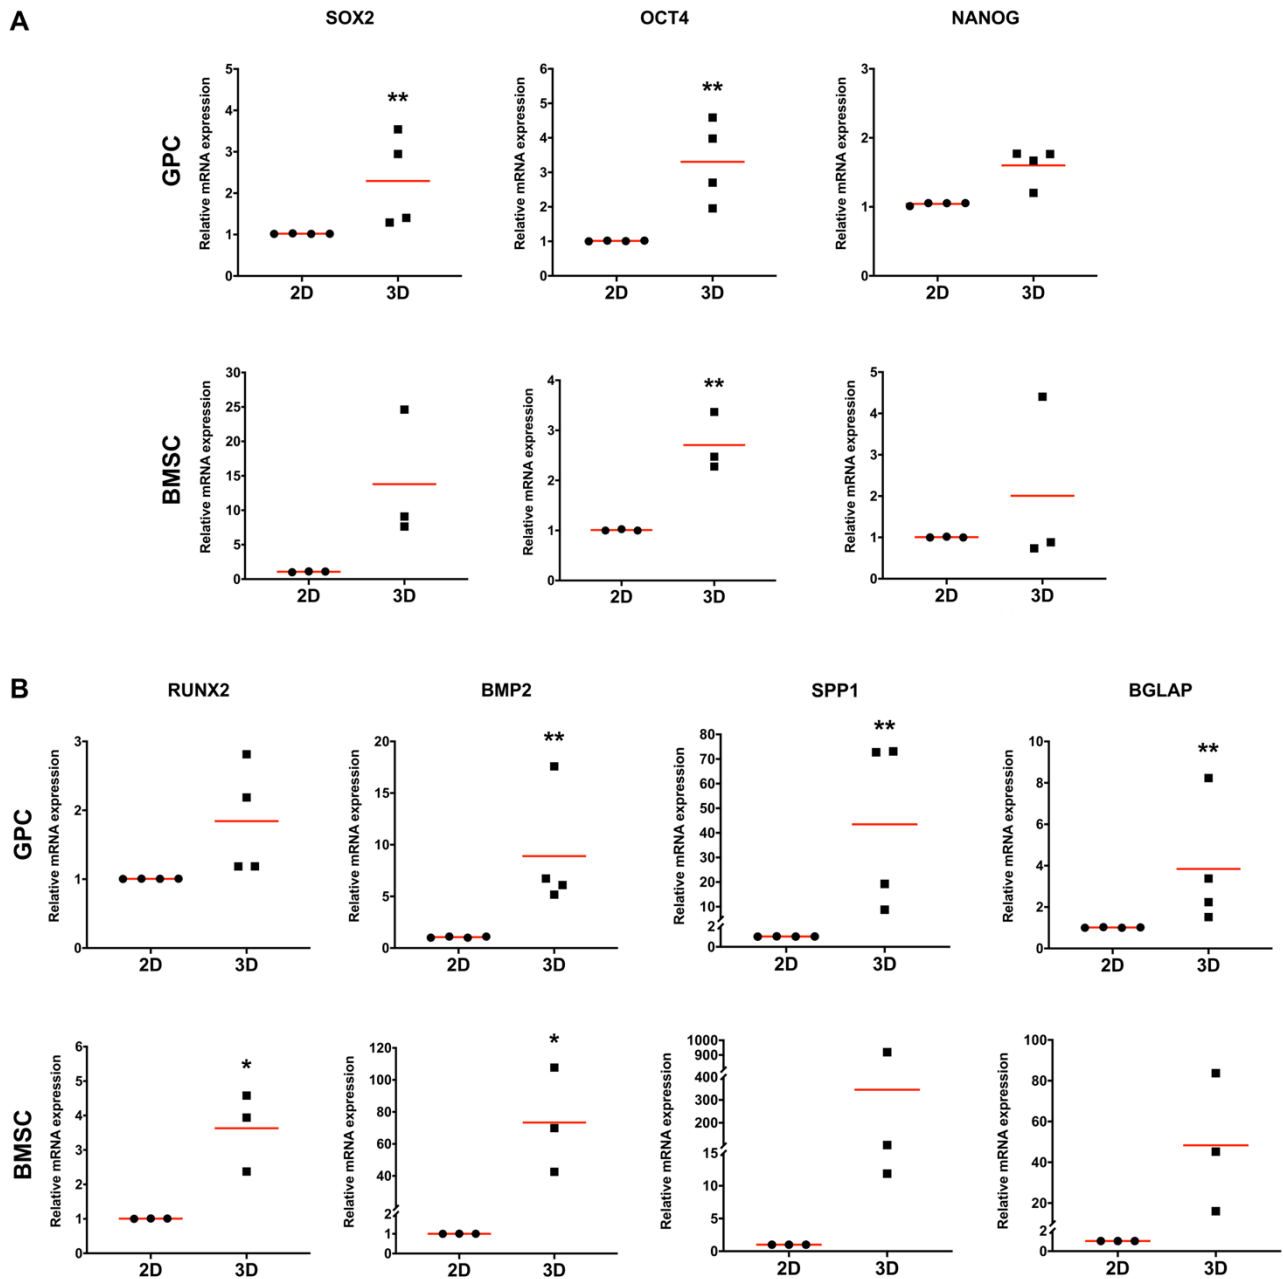

Relative expression (fold changes) of stemness- (A) and osteogenesis-related genes (B) after 7 d in 2D vs. 3D GPCs and BMSCs; data represent means; each symbol represents a single donor ( $n \geq 3$ ); statistical analyses are based on delta-Ct values; \* $p < 0.05$ ; \*\* $p < 0.001$ .

## Supplementary material

### 2.5. Supplementary figure 3: Immunofluorescence staining of 2D GPCs and BMSCs

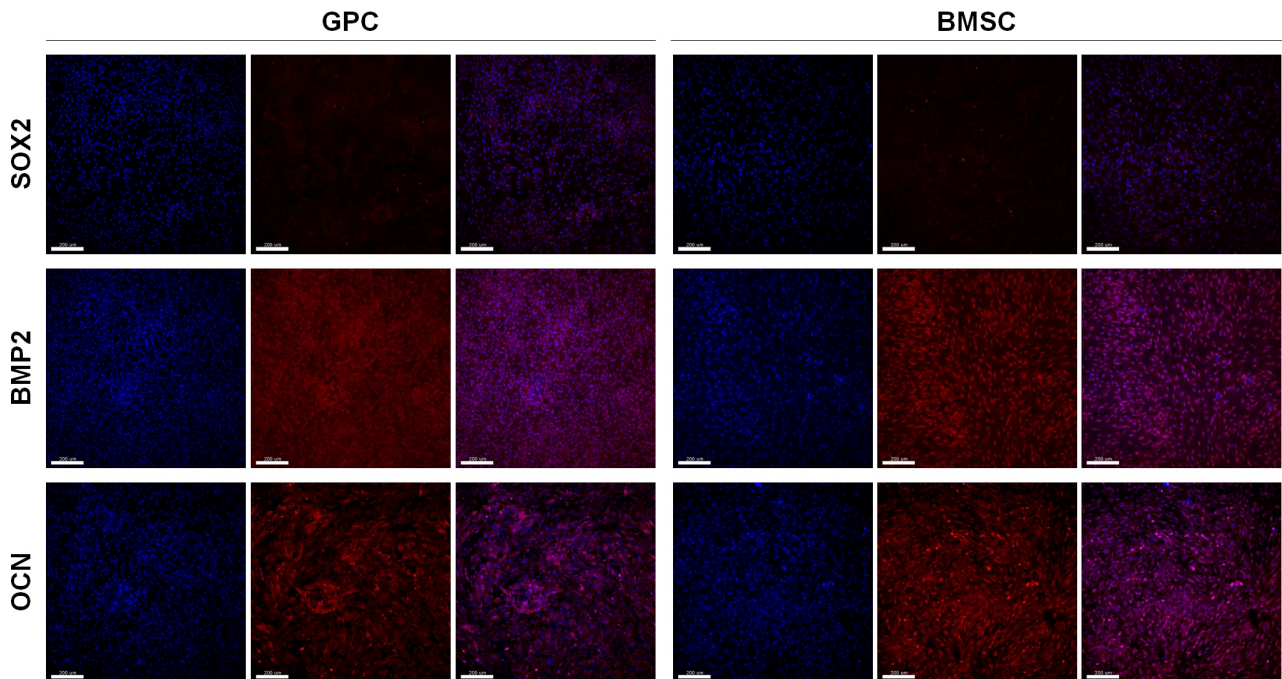

IF staining of 2D monolayer GPCs and BMSCs for stemness (SOX2) and osteogenesis-related markers (BMP2, OCN) after 14 d culture in standard and osteogenic induction media, respectively; scale bars 100  $\mu\text{m}$ . Positive and comparable staining for BMP2 and OCN was observed in GPCs and BMSCs.

## Supplementary material

### 2.6. Supplementary figure 4: Protein estimation of BMP2 via western blotting in 2D and 3D GPCs and BMSCs

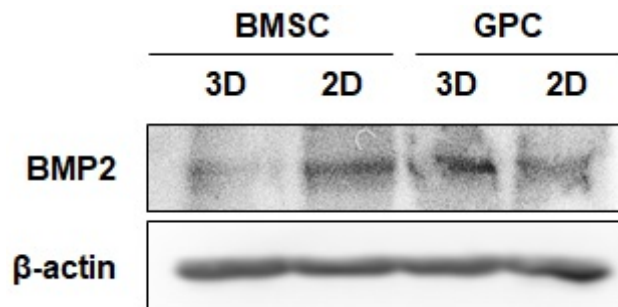

Protein estimation of BMP2 was performed via western blotting via SDS gel electrophoresis and blotting onto polyvinylidene difluoride (PVDF) membranes. The membranes were incubated with the following primary antibodies overnight at 4°C: anti-BMP2 (R&D systems) and anti- $\beta$ -actin as a reference protein (Invitrogen). After extensive washing, the membranes were further incubated with horseradish peroxidase-conjugated secondary antibodies for 1 h and then developed using an enhanced chemiluminescence detection system (all from Bio-rad).

### 2.7. Supplementary table 3: Cytokine concentrations in 2D and 3D GPCs and BMSCs.

## Supplementary material

|                               | GPC       |          |          |         | BMSC      |         |          |         |
|-------------------------------|-----------|----------|----------|---------|-----------|---------|----------|---------|
|                               | 2D        |          | 3D       |         | 2D        |         | 3D       |         |
|                               | Mean      | SD       | Mean     | SD      | Mean      | SD      | Mean     | SD      |
| <b>Growth factors</b>         |           |          |          |         |           |         |          |         |
| FGF2                          | 0.04012   | 0.00478  | 0.18143  | 0.00197 | 0.02768   | 0.00530 | 0.04271  | 0.00001 |
| PDGFbb                        | 0.04337   | 0.01677  | 0.13879  | 0.00952 | 0.03152   | 0.00506 | 0.13655  | 0.00067 |
| HGF                           | 24.24730  | 0.87560  | 42.10489 | 1.40289 | 1.99578   | 0.25363 | 3.77988  | 0.06782 |
| VEGF                          | 0.72088   | 0.12111  | 1.69592  | 0.04196 | 3.94904   | 0.43366 | 1.69724  | 0.05659 |
| TGFb1                         | 24.50784  | 25.92031 | 53.98704 | 6.14884 | 17.95800  | 1.87240 | 35.67928 | 6.78256 |
| SCF                           | 0.04295   | 0.00382  | 0.04931  | 0.00303 | 0.05008   | 0.00406 | 0.01840  | 0.00024 |
| SCGFb                         | 113.14256 | 3.54892  | 95.36207 | 2.94256 | 110.21860 | 8.45354 | 74.49511 | 1.97597 |
| GCSF                          | 0.25382   | 0.03767  | 0.45470  | 0.03915 | 0.16630   | 0.00391 | 0.13473  | 0.00454 |
| GMCSF                         | 0.00281   | 0.00422  | 0.00456  | 0.00021 | 0.00202   | 0.00021 | 0.00082  | 0.00012 |
| MCSF                          | 0.03043   | 0.00432  | 0.02100  | 0.00062 | 0.04031   | 0.00780 | 0.01267  | 0.00030 |
| <b>Chemokines</b>             |           |          |          |         |           |         |          |         |
| CCL11                         | 0.16741   | 0.00556  | 0.04998  | 0.00012 | 0.01049   | 0.00137 | 0.00118  | 0.00003 |
| CXCL10                        | 0.03273   | 0.00471  | 0.02468  | 0.00072 | 0.00911   | 0.00330 | 0.00907  | 0.00001 |
| CCL2                          | 2.13776   | 0.13538  | 2.27424  | 0.07038 | 0.93586   | 0.12059 | 1.47786  | 0.02184 |
| CCL3                          | 0.00086   | 0.00029  | 0.00129  | 0.00001 | 0.00088   | 0.00023 | 0.00073  | 0.00005 |
| CCL4                          | 0.04168   | 0.01010  | 0.10332  | 0.00365 | 0.03960   | 0.01123 | 0.08331  | 0.00226 |
| CCL5                          | 5.85575   | 0.20835  | 7.63716  | 0.15172 | 1.44246   | 0.22004 | 9.65767  | 0.20100 |
| CXCL1                         | 3.65130   | 0.01579  | 2.06174  | 0.13972 | 0.16873   | 0.03515 | 6.66148  | 0.41839 |
| CCL7                          | 0.08885   | 0.00569  | 0.15191  | 0.00706 | 0.53342   | 0.06061 | 0.20476  | 0.00486 |
| LIF                           | 0.12380   | 0.02919  | 0.66383  | 0.01056 | 0.07635   | 0.01774 | 0.65338  | 0.00975 |
| MIF                           | 1.30814   | 0.07396  | 4.06624  | 0.26745 | 0.72819   | 0.29118 | 5.04052  | 0.25619 |
| CXCL12                        | 0.23595   | 0.02569  | 0.18201  | 0.00560 | 0.21189   | 0.03144 | 0.11132  | 0.00479 |
| <b>Inflammatory cytokines</b> |           |          |          |         |           |         |          |         |
| IL1a                          | 0.02693   | 0.00994  | 0.02109  | 0.00164 | 0.02588   | 0.00858 | 0.00960  | 0.00001 |
| IL1b                          | 0.00251   | 0.00102  | 0.00247  | 0.00001 | 0.00222   | 0.00067 | 0.00081  | 0.00011 |
| IL2                           | 0.00471   | 0.00280  | 0.00180  | 0.00001 | 0.00324   | 0.00223 | 0.00109  | 0.00032 |
| IL4                           | 0.00353   | 0.00214  | 0.00307  | 0.00019 | 0.00376   | 0.00068 | 0.00194  | 0.00004 |
| IL5                           | 0.05189   | 0.05215  | 0.03438  | 0.00001 | 0.03339   | 0.00435 | 0.02244  | 0.00091 |
| IL6                           | 4.37381   | 0.03748  | 0.68100  | 0.06986 | 0.82140   | 0.10703 | 2.16931  | 0.07043 |
| IL7                           | 0.01789   | 0.00672  | 0.02066  | 0.00310 | 0.01402   | 0.00315 | 0.00608  | 0.00083 |
| IL8                           | 0.31796   | 0.06139  | 0.63340  | 0.07276 | 0.07324   | 0.01182 | 3.57365  | 0.03481 |
| IL9                           | 0.06582   | 0.02222  | 0.16124  | 0.00506 | 0.06258   | 0.01968 | 0.12090  | 0.00044 |
| IL10                          | 0.00854   | 0.00080  | 0.00387  | 0.00001 | 0.00502   | 0.00252 | 0.00256  | 0.00033 |
| TNFa                          | 0.01963   | 0.00316  | 0.02714  | 0.00001 | 0.02310   | 0.00592 | 0.01133  | 0.00123 |
| IFNg                          | 0.07505   | 0.00856  | 0.03856  | 0.00394 | 0.06054   | 0.00678 | 0.01762  | 0.00123 |

To account for differences in cell numbers between 2D and 3D cultures at the end of the culture period, cytokine concentrations (pg/mL) were normalized to the corresponding total DNA (ng/mL); data represent pg protein/ng DNA.

## Supplementary material

### 2.8. Supplementary figure 5: Gene expression in 3D spheroids of FBS-cultured GPCs.

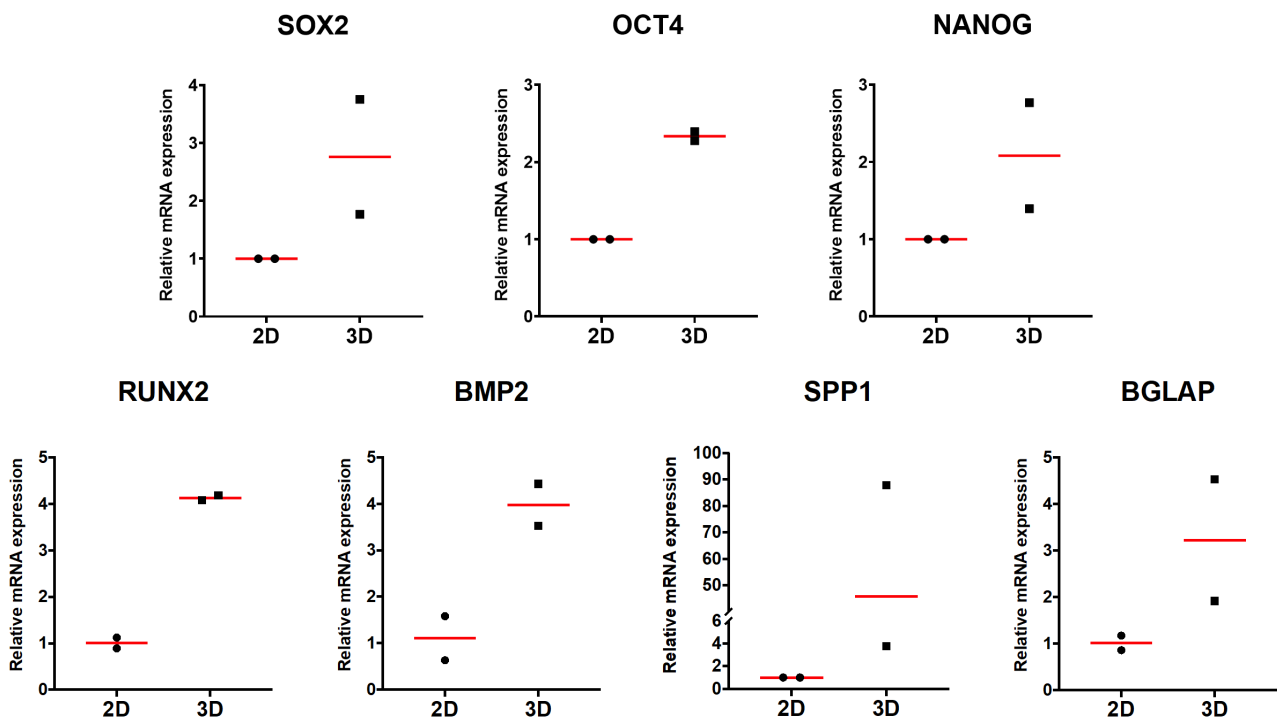

Relative expression (fold changes) of stemness- and osteogenesis-related genes after 7 d in 2D vs. 3D GPCs; data represent means; each symbol represents a single donor (n=2).



## Supplementary material

### 2.9. Supplementary figure 6: Schematic representation of the hypothesized mechanism for self-renewal and lineage commitment in 3D spheroids.

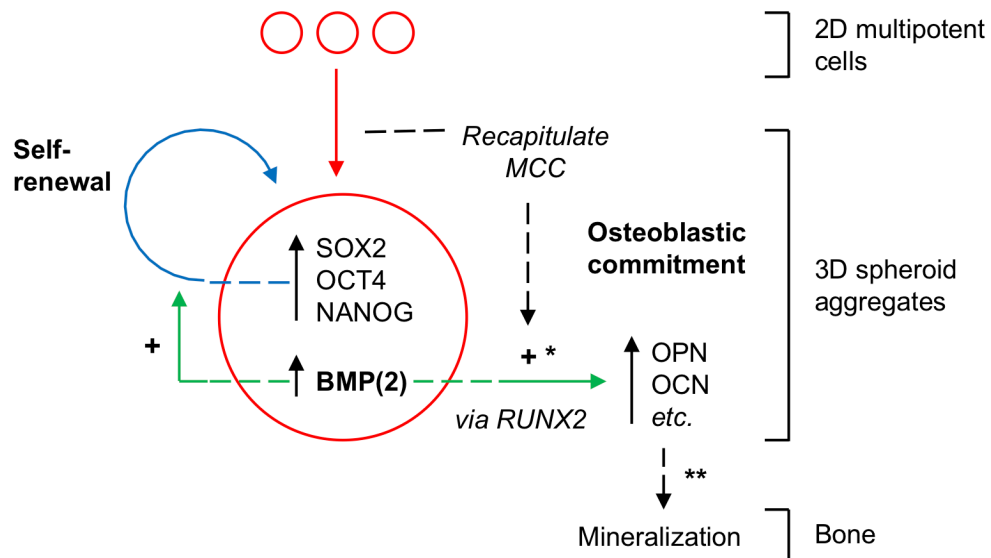

MCC, mesenchymal cell condensations; \* independent of osteogenic induction; \*\* dependent on osteogenic induction.
